# Supplementary material
Source: Springer Nature journal article supplement (https://www.springermedizin.de/resource/supplementary/12874_2011_740_MOESM1_ESM.pdf/9432830)

# Random effects Meta-Analysis of Hazard Ratios

## Hazard ratios from Cox models

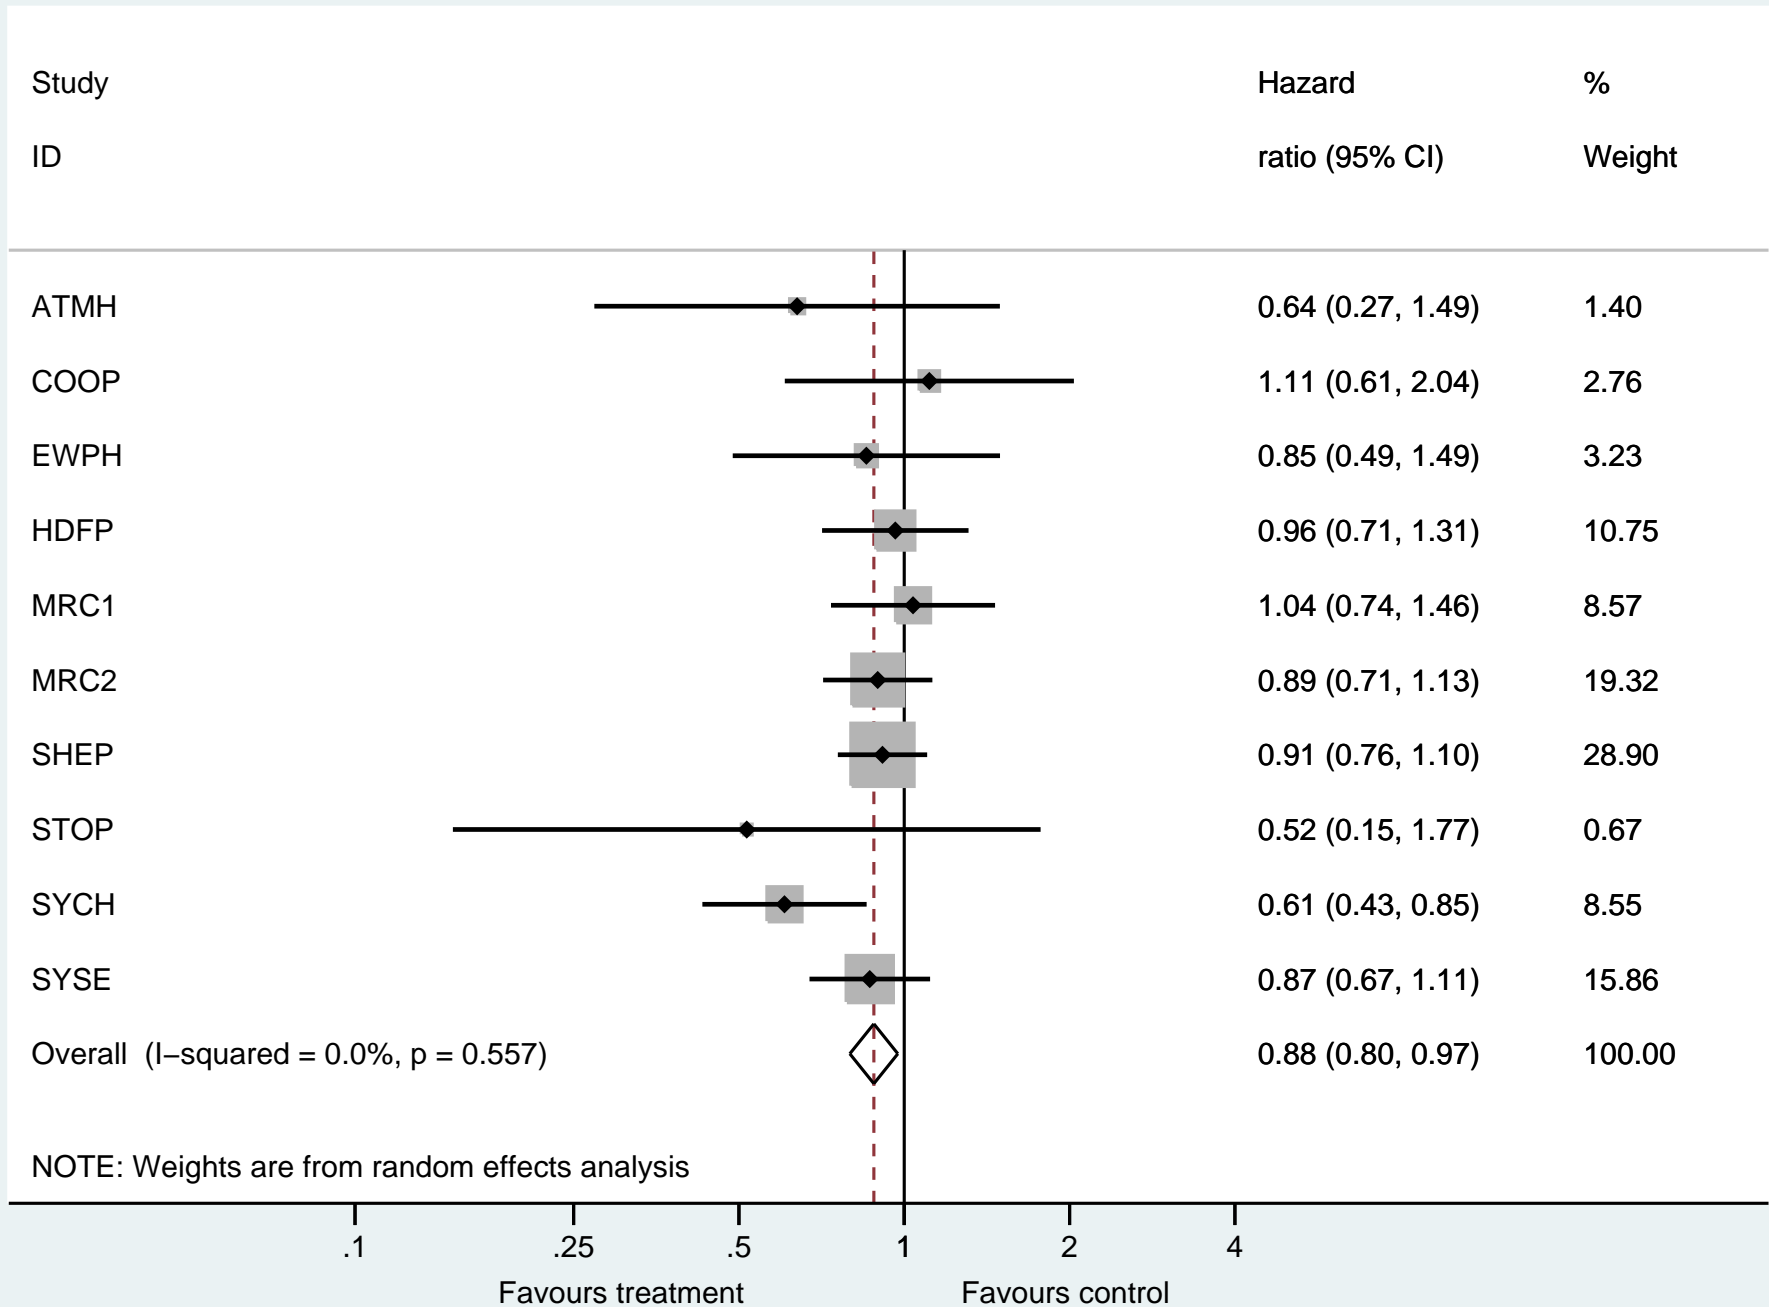

Supplement: MOESM1 [file 9432830]
